# Supplementary material for: Early Adoption of Anti–SARS-CoV-2 Pharmacotherapies Among US Veterans With Mild to Moderate COVID-19, January and February 2022
Source: PubMed Central journal article supplement (PMC9652752; doi:10.1001/jamanetworkopen.2022.41434), 2022-11-11
Supplement: jamanetwopen-e2241434-s001.pdf [file jamanetwopen-e2241434-s001.pdf]

## Supplemental Online Content

Bajema KL, Wang XQ, Hynes DM, et al. Early adoption of anti-SARS-CoV-2 pharmacotherapies among US veterans with mild to moderate COVID-19, January to February 2022. *JAMA Netw Open*. 2022;5(11):e2241434. doi:10.1001/jamanetworkopen.2022.41434

### **eAppendix.** Supplemental Methods

**eTable 1.** Risk Factors for Severe COVID-19

**eTable 2.** Immunosuppressive and Cancer Medications

**eTable 3.** National Institutes of Health (NIH) Tiers of Prioritization for Anti-SARS-CoV-2 Therapies

**eTable 4.** Factors Associated With Receipt of Different COVID-19 Pharmacotherapies Among Veterans, January-February 2022

**eTable 5.** Factors Associated With Receipt of Any COVID-19 Pharmacotherapy Among Symptomatic Veterans, January-February 2022

### **eReferences**

This supplemental material has been provided by the authors to give readers additional information about their work.

## **eAppendix. Supplemental Methods**

### COVID-19 Vaccination Status

Veterans were considered unvaccinated if they did not receive any COVID-19 vaccine or received a vaccine dose other than Janssen less than 14 days prior to the first positive SARS-CoV-2 test (index date). Partial vaccination was defined as having received a single mRNA dose (Pfizer-BioNTech or Moderna) alone or in combination with another vaccine other than Janssen  $\leq 14$  days prior to the index date or a Janssen (Johnson & Johnson) dose  $< 14$  days before the index date. For Veterans not considered to be moderately or severely immunocompromised (i.e., had not recently received immunosuppressive or cancer medications as described in Supplementary Table 2), full vaccination was defined as receipt of both doses of an mRNA vaccine (Pfizer-BioNTech or Moderna) or a single Janssen dose  $\geq 14$  days before the index date. Non-immunocompromised Veterans were considered boosted if they either received 1 dose of Janssen followed by another dose of Janssen or mRNA vaccine  $\geq 14$  days before the index date or if they received  $\geq 3$  vaccine doses (which included at least 1 mRNA dose)  $\geq 7$  days before the index date. Moderately or severely immunocompromised Veterans who either received 3 mRNA vaccine doses  $\geq 7$  days before the index date or 1 dose of Janssen followed by another dose of Janssen or mRNA vaccine  $\geq 14$  days before the index date were considered fully vaccinated.<sup>1</sup> Immunocompromised Veterans who received  $\geq 4$  mRNA doses  $\geq 7$  days before the index date were considered boosted.

### NIH Tiers

To categorize vaccination as a binary variable for the National Institutes of Health (NIH) tiers of prioritization for anti-SARS-CoV-2 therapies, we considered unvaccinated and partially vaccinated Veterans as 'unvaccinated' for tiers 1 and 2 and fully vaccinated and boosted as 'vaccinated.'

**eTable 1. Risk factors for severe COVID-19<sup>a</sup>**

|                                                                                                                                                                                                                              |
|------------------------------------------------------------------------------------------------------------------------------------------------------------------------------------------------------------------------------|
| <b>Age ≥ 65 years</b>                                                                                                                                                                                                        |
| <b>Underlying Medical Conditions</b>                                                                                                                                                                                         |
| Cancer                                                                                                                                                                                                                       |
| Cardiovascular disease including cardiomyopathy, chronic rheumatic heart disease, congestive heart failure, coronary artery disease, hypertension, myocardial infarction, peripheral artery disease, pulmonary heart disease |
| Chronic kidney disease including dialysis                                                                                                                                                                                    |
| Chronic liver disease including chronic hepatitis and cirrhosis                                                                                                                                                              |
| Chronic lung disease including asthma, chronic obstructive pulmonary disease, emphysema, pulmonary fibrosis                                                                                                                  |
| Chronic neurologic conditions including epilepsy, Multiple Sclerosis, and Parkinson's Disease                                                                                                                                |
| Dementia                                                                                                                                                                                                                     |
| Diabetes                                                                                                                                                                                                                     |
| HIV                                                                                                                                                                                                                          |
| Immunosuppressive medications or cancer therapies (see Supplementary Table 2)                                                                                                                                                |
| Mental health conditions including bipolar disorder, major depressive disorder, and schizophrenia                                                                                                                            |
| Overweight (body mass index 25 to <30 kg/m <sup>2</sup> ) or obese (body mass index ≥30 kg/m <sup>2</sup> ) or                                                                                                               |
| Pregnancy                                                                                                                                                                                                                    |
| Sickle cell disease                                                                                                                                                                                                          |
| Stroke or cerebrovascular disease                                                                                                                                                                                            |
| Thalassemia                                                                                                                                                                                                                  |
| <b>Current or former tobacco use</b>                                                                                                                                                                                         |
| <b>Substance use</b>                                                                                                                                                                                                         |
| Alcohol dependence                                                                                                                                                                                                           |
| Non-alcohol substance dependence                                                                                                                                                                                             |

<sup>a</sup>Age at the time of positive SARS-CoV-2 test or underlying conditions, tobacco, or substance use documented in the two years prior to positive SARS-CoV-2 test.

**eTable 2. Immunosuppressive and cancer medications<sup>a</sup>**

| <b>Drug class</b>                          | <b>Drugs</b>                                                                                                                                                                              |
|--------------------------------------------|-------------------------------------------------------------------------------------------------------------------------------------------------------------------------------------------|
| Alkylating agents                          | bendamustine, busulfan, chlorambucil, cisplatin, cyclophosphamide, ifosfamide, lurbinectedin, melphalan, nitrogen mustard procarbazine, temozolomide                                      |
| Anti-CD19/CD3                              | blinatumomab                                                                                                                                                                              |
| Anti-HER2                                  | trastuzumab                                                                                                                                                                               |
| Antimetabolites                            | azathioprine, capecitabine, cladribine, cytarabine, fludarabine, floxuridine, fluorouracil, gemcitabine, mercaptopurine, methotrexate, pemetrexed, pentostatin, pralatrexate, thioguanine |
| Antitumor antibiotics                      | bleomycin, dacarbazine, dactinomycin, daunorubicin, doxorubicin, epirubidin, idarubicin, mitomycin, mitoxantrone                                                                          |
| B-cell depletion and inhibition            | belimumab, ibriumomab, tiuxetan, obinutuzumab, ocrelizumab, <sup>b</sup> ofatumumab, <sup>b</sup> rituximab <sup>b</sup>                                                                  |
| BCL2 inhibitors                            | venetoxlax                                                                                                                                                                                |
| Interferon                                 | interferon alpha-2a, interferon alpha-2b, interferon beta-1a, interferon beta-1b, interferon gamma, interferon gamma-1b                                                                   |
| BCR-ABL tyrosine kinase inhibitors         | bosutinib, dasatinib, imatinib, nilotinib, ponatinib                                                                                                                                      |
| Bruton tyrosine kinase (BTK) inhibitors    | acalabrutinib, ibrutinib, zanubrutinib                                                                                                                                                    |
| Calcineurin inhibitors                     | cyclosporine, pimecrolimus, tacrolimus, voclosporin                                                                                                                                       |
| Complement inhibitor                       | eculizumab                                                                                                                                                                                |
| EGFR inhibitors                            | afatinib, cetuximab, dacomitinib, erlotinib, gefitinib, lapatinib, mobocertinib, necitumumab, osimertinib, panitumumab                                                                    |
| Glucocorticoids (systemic)                 | cortisone acetate, betamethasone, budesonide, dexamethasone, hydrocortisone, methylprednisolone, prednisolone, prednisone                                                                 |
| Histone deacetylase inhibitors             | belinostat, vorinostat                                                                                                                                                                    |
| IL-1 inhibitors                            | anakinra, canakinumab, rilonacept                                                                                                                                                         |
| IL-12/23 inhibitors                        | guselkumab, ustekinumab                                                                                                                                                                   |
| IL-17 inhibitors                           | brodalumab, ixekizumab, secukinumab                                                                                                                                                       |
| IL-4/13 inhibitors                         | dupilumab                                                                                                                                                                                 |
| IL-5 inhibitors                            | benralizumab, mepolizumab, reslizumab                                                                                                                                                     |
| IL-6 inhibitors                            | sarilumab, siltuximab, tocilizumab                                                                                                                                                        |
| Immune checkpoint inhibitors (anti-CTLA-4) | ipilimumab                                                                                                                                                                                |
| Immune checkpoint inhibitors (anti-PD-1)   | cemiplimab, dostarlimab, nivolumab, pembrolizumab                                                                                                                                         |
| Immune checkpoint inhibitors (anti-PD-L1)  | atezolizumab, avelumab, durvalumab                                                                                                                                                        |
| Immune globulin                            | anti-thymocyte globulin <sup>b</sup>                                                                                                                                                      |
| Immunosuppressant agent                    | mycophenolate mofetil (MMF), mycophenolate sodium                                                                                                                                         |
| Janus kinase (JAK) inhibitors              | baricitinib, ruxolitinib, tofacitinib, upadacitinib                                                                                                                                       |
| Miscellaneous antineoplastics              | arsenic trioxide, blinhydroxyurea, idelalisib, olaparib, omacetaxine, palbociclib, pegaspargase, thalidomide, trabectedin                                                                 |
| Miscellaneous biological                   | glatiramer acetate                                                                                                                                                                        |

|                                         |                                                                                                                       |
|-----------------------------------------|-----------------------------------------------------------------------------------------------------------------------|
| Miscellaneous other                     | leflunomide, sulfasalazine                                                                                            |
| mTOR kinase inhibitors                  | everolimus, sirolimus, temsirolimus                                                                                   |
| Nitrosoureas                            | carmustine, lomustine, streptozocin                                                                                   |
| Platinum derivatives                    | carboplatin, oxaliplatin                                                                                              |
| Proteasome inhibitors                   | bortezomib, carfilzomib                                                                                               |
| Selective adhesion-molecule inhibitors  | natalizumab, vedolizumab                                                                                              |
| T-cell costimulation inhibitors         | abatacept, belatacept, alemtuzumab, <sup>b</sup> basiliximab                                                          |
| Thalidomide analogs                     | lenalidomide, pomalidomide                                                                                            |
| TNF inhibitors                          | adalimumab, certolizumab, etanercept, golimumab, infliximab                                                           |
| Topoisomerase inhibitors                | irinotecan, mitoxantrone, topotecan                                                                                   |
| Tubulin-acting agents                   | eribulin, etoposide, ixabepilone                                                                                      |
| Tubulin-acting agents (taxanes)         | cabazitaxel, docetaxel, nabpaclitaxel, paclitaxel                                                                     |
| Tubulin-acting agents (vinca alkaloids) | vinblastine, vincristine, vinorelbine                                                                                 |
| VEGF tyrosine kinase inhibitors         | aflibercept, axitinib, bevacizumab, lenvatinib, pazopanib, ramucirumab, regorafenib, sorafenib, sunitinib, vandetanib |

<sup>a</sup>Prescriptions filled within 90 days of positive SARS-CoV-2 test unless otherwise indicated

<sup>b</sup>Filled within one year of COVID-19 diagnosis

**eTable 3. National Institutes of Health (NIH) tiers of prioritization for anti-SARS-CoV-2 therapies<sup>a</sup>**

| NIH Tier | Risk Group Definition <sup>b</sup>                                                                                                                                                                                                                                                                                                                                                                                                                               |
|----------|------------------------------------------------------------------------------------------------------------------------------------------------------------------------------------------------------------------------------------------------------------------------------------------------------------------------------------------------------------------------------------------------------------------------------------------------------------------|
| 1        | <ul style="list-style-type: none"> <li>- Receipt of immunosuppressive or cancer medications<sup>c</sup> <i>or</i></li> <li>- HIV with most recent absolute CD4 count <math>\leq 2</math> years is <math>\leq 200</math> cells/mm<sup>3</sup> <i>or</i></li> <li>- Unvaccinated<sup>d</sup> and age <math>\geq 75</math> years <i>or</i></li> <li>- Unvaccinated, age 65-74 years, and <math>\geq 1</math> risk factor for severe COVID-19<sup>e</sup></li> </ul> |
| 2        | <ul style="list-style-type: none"> <li>- Unvaccinated, age 65-74 years, and no risk factors for severe COVID-19 <i>or</i></li> <li>- Unvaccinated, age <math>&lt; 65</math> years, and <math>\geq 1</math> risk factor for severe COVID-19</li> </ul>                                                                                                                                                                                                            |
| 3        | <ul style="list-style-type: none"> <li>- Vaccinated<sup>d</sup> and age <math>\geq 75</math> years <i>or</i></li> <li>- Vaccinated, age 65-74 years and <math>\geq 1</math> risk factor for severe COVID-19</li> </ul>                                                                                                                                                                                                                                           |
| 4        | <ul style="list-style-type: none"> <li>- Vaccinated, age 65-74 years, and no risk factors for severe COVID-19 <i>or</i></li> <li>- Vaccinated, age <math>&lt; 65</math> years, and <math>\geq 1</math> risk factor for severe COVID-19</li> </ul>                                                                                                                                                                                                                |
| Other    | <ul style="list-style-type: none"> <li>- Vaccination status not determined (individuals not included in Tier 1)</li> </ul>                                                                                                                                                                                                                                                                                                                                       |

<sup>a</sup>Per NIH definitions: <https://www.covid19treatmentguidelines.nih.gov/overview/prioritization-of-therapeutics/?msclkid=9db67596cf2311ec8b6f159cc2c59087>

<sup>b</sup>All factors determined with reference to positive SARS-CoV-2 test

<sup>c</sup>As defined in Supplementary Table 2

<sup>d</sup>As defined in the Supplemental Methods

<sup>e</sup>As defined in Supplementary Table 1

**eTable 4. Factors associated with receipt of different COVID-19 pharmacotherapies among Veterans, January-February 2022<sup>a</sup>**

| Characteristic                  | Sotrovimab/<br>total<br>n/N (%) | Sotrovimab<br>Adjusted OR<br>(95% CI) | Nirmatrelvir/<br>total<br>n/N (%) | Nirmatrelvir<br>Adjusted OR<br>(95% CI) | Molnupiravir/<br>total<br>n/N (%) | Molnupiravir<br>Adjusted OR<br>(95% CI) | Remdesivir/<br>total n/N (%) | Remdesivir<br>Adjusted OR<br>(95% CI) |
|---------------------------------|---------------------------------|---------------------------------------|-----------------------------------|-----------------------------------------|-----------------------------------|-----------------------------------------|------------------------------|---------------------------------------|
| Age, years                      |                                 |                                       |                                   |                                         |                                   |                                         |                              |                                       |
| 18-49                           | 80/28,890 (0.3)                 | 0.46 (0.35-0.6)                       | 265/28,890 (0.9)                  | 0.6 (0.51-0.69)                         | 104/28,890 (0.4)                  | 0.45 (0.36-0.57)                        | 58/28,890 (0.2)              | 0.39 (0.29-0.53)                      |
| 50-64 (ref)                     | 176/30,749 (0.6)                | -                                     | 456/30,749 (1.5)                  | -                                       | 239/30,749 (0.8)                  | -                                       | 159/30,749 (0.5)             | -                                     |
| 65-74                           | 382/24,815 (1.5)                | 2.66 (2.22-3.19)                      | 530/24,815 (2.1)                  | 1.42 (1.25-1.61)                        | 300/24,815 (1.2)                  | 1.53 (1.28-1.81)                        | 189/24,815 (0.8)             | 1.44 (1.17-1.79)                      |
| ≥75                             | 273/16,133 (1.7)                | 2.82 (2.32-3.43)                      | 326/16,133 (2.0)                  | 1.29 (1.12-1.5)                         | 214/16,133 (1.3)                  | 1.62 (1.34-1.95)                        | 139/16,133 (0.9)             | 1.6 (1.26-2.02)                       |
| Female sex                      | 73/13,526 (0.5)                 | 1.03 (0.81-1.33)                      | 164/13,526 (1.2)                  | 0.99 (0.84-1.17)                        | 81/13,526 (0.6)                   | 1 (0.79-1.27)                           | 41/13,526 (0.3)              | 0.77 (0.55-1.06)                      |
| Race                            |                                 |                                       |                                   |                                         |                                   |                                         |                              |                                       |
| White (ref)                     | 753/74,093 (1.0)                | -                                     | 1,295/74,093 (1.7)                | -                                       | 703/74,093 (0.9)                  | -                                       | 428/74,093 (0.6)             | -                                     |
| Black                           | 124/22,756 (0.5)                | 0.61 (0.5-0.74)                       | 245/22,756 (1.1)                  | 0.63 (0.55-0.72)                        | 135/22,756 (0.6)                  | 0.65 (0.53-0.78)                        | 102/22,756 (0.4)             | 0.83 (0.66-1.03)                      |
| Other                           | 34/3,738 (0.9)                  | 1.13 (0.8-1.59)                       | 37/3,738 (1.0)                    | 0.62 (0.45-0.87)                        | 19/3,738 (0.5)                    | 0.63 (0.4-0.99)                         | 15/3,738 (0.4)               | 0.83 (0.49-1.39)                      |
| Hispanic ethnicity              | 61/8,609 (0.7)                  | 0.88 (0.67-1.14)                      | 127/8,609 (1.5)                   | 0.97 (0.81-1.17)                        | 47/8,609 (0.5)                    | 0.68 (0.51-0.92)                        | 37/8,609 (0.4)               | 0.89 (0.64-1.25)                      |
| Rural residence                 | 204/16,137 (1.3)                | 1.31 (1.12-1.55)                      | 298/16,137 (1.8)                  | 1.09 (0.96-1.25)                        | 190/16,137 (1.2)                  | 1.29 (1.1-1.53)                         | 99/16,137 (0.6)              | 1.08 (0.86-1.35)                      |
| Region                          |                                 |                                       |                                   |                                         |                                   |                                         |                              |                                       |
| West (ref)                      | 183/23,959 (0.8)                | -                                     | 322/23,959 (1.3)                  | -                                       | 211/23,959 (0.9)                  | -                                       | 106/23,959 (0.4)             | -                                     |
| Midwest                         | 241/18,831 (1.3)                | 1.73 (1.41-2.11)                      | 395/18,831 (2.1)                  | 1.55 (1.33-1.81)                        | 196/18,831 (1.0)                  | 1.07 (0.88-1.31)                        | 40/18,831 (0.2)              | 0.51 (0.35-0.74)                      |
| Northeast                       | 191/14,147 (1.4)                | 1.84 (1.48-2.27)                      | 317/14,147 (2.2)                  | 1.71 (1.46-2.02)                        | 88/14,147 (0.6)                   | 0.66 (0.51-0.86)                        | 136/14,147 (1.0)             | 2.3 (1.76-3.01)                       |
| South                           | 296/43,650 (0.7)                | 0.99 (0.82-1.2)                       | 543/43,650 (1.2)                  | 0.95 (0.82-1.1)                         | 362/43,650 (0.8)                  | 0.95 (0.8-1.13)                         | 263/43,650 (0.6)             | 1.47 (1.16-1.88)                      |
| COVID-19 vaccination            |                                 |                                       |                                   |                                         |                                   |                                         |                              |                                       |
| None (ref)                      | 245/30,671 (0.8)                | -                                     | 457/30,671 (1.5)                  | -                                       | 196/30,671 (0.6)                  | -                                       | 147/30,671 (0.5)             | -                                     |
| Partial                         | 61/3,917 (1.6)                  | 1.81 (1.35-2.43)                      | 77/3,917 (2.0)                    | 1.29 (1.01-1.67)                        | 35/3,917 (0.9)                    | 1.3 (0.89-1.9)                          | 36/3,917 (0.9)               | 1.85 (1.27-2.68)                      |
| Full                            | 371/41,418 (0.9)                | 0.98 (0.83-1.16)                      | 572/41,418 (1.4)                  | 0.87 (0.77-0.99)                        | 336/41,418 (0.8)                  | 1.19 (0.99-1.42)                        | 197/41,418 (0.5)             | 0.88 (0.71-1.1)                       |
| Boosted                         | 234/24,557 (1.0)                | 0.79 (0.65-0.95)                      | 471/24,557 (1.9)                  | 1.08 (0.94-1.24)                        | 290/24,557 (1.2)                  | 1.47 (1.21-1.78)                        | 165/24,557 (0.7)             | 0.99 (0.78-1.25)                      |
| Smoking                         |                                 |                                       |                                   |                                         |                                   |                                         |                              |                                       |
| Never (ref)                     | 327/39,061 (0.8)                | -                                     | 622/39,061 (1.6)                  | -                                       | 306/39,061 (0.8)                  | -                                       | 207/39,061 (0.5)             | -                                     |
| Former                          | 446/40,274 (1.1)                | 1.09 (0.94-1.26)                      | 664/40,274 (1.6)                  | 0.92 (0.82-1.03)                        | 380/40,274 (0.9)                  | 1.04 (0.89-1.21)                        | 238/40,274 (0.6)             | 0.98 (0.81-1.19)                      |
| Current                         | 102/17,286 (0.6)                | 0.78 (0.62-0.97)                      | 236/17,286 (1.4)                  | 0.87 (0.75-1.01)                        | 149/17,286 (0.9)                  | 1.15 (0.94-1.4)                         | 75/17,286 (0.4)              | 0.87 (0.67-1.14)                      |
| Alcohol dependence              | 137/22,658 (0.6)                | 0.76 (0.63-0.91)                      | 273/22,658 (1.2)                  | 0.79 (0.69-0.9)                         | 145/22,658 (0.6)                  | 0.78 (0.65-0.94)                        | 91/22,658 (0.4)              | 0.77 (0.61-0.98)                      |
| Substance dependence            | 23/5,400 (0.4)                  | 0.64 (0.42-0.99)                      | 56/5,400 (1)                      | 0.77 (0.59-1.01)                        | 40/5,400 (0.7)                    | 1.07 (0.77-1.48)                        | 35/5,400 (0.6)               | 1.31 (0.9-1.91)                       |
| Number of underlying conditions |                                 |                                       |                                   |                                         |                                   |                                         |                              |                                       |
| 1-2 (ref)                       | 108/37,502 (0.3)                | -                                     | 425/37,502 (1.1)                  | -                                       | 167/37,502 (0.4)                  | -                                       | 90/37,502 (0.2)              | -                                     |
| 3-4                             | 255/31,289 (0.8)                | 2.47 (1.95-3.13)                      | 534/31,289 (1.7)                  | 1.38 (1.21-1.58)                        | 277/31,289 (0.9)                  | 1.69 (1.38-2.06)                        | 156/31,289 (0.5)             | 1.82 (1.38-2.4)                       |
| ≥5                              | 543/29,852 (1.8)                | 4.2 (3.34-5.29)                       | 599/29,852 (2.0)                  | 1.41 (1.23-1.63)                        | 410/29,852 (1.4)                  | 2.25 (1.85-2.75)                        | 293/29,852 (1.0)             | 3.16 (2.42-4.13)                      |

<sup>a</sup>Results of multinomial and binomial models are similar. Multinomial models adjusted for age, sex, race, and ethnicity are presented and limited to Veterans with complete data for all included covariates.

**eTable 5. Factors associated with receipt of any COVID-19 pharmacotherapy among symptomatic Veterans, January-February 2022<sup>a</sup>**

| Characteristic                                       | Any treatment/total n/N (%) <sup>b</sup> | Any treatment Adjusted OR (95% CI) <sup>c</sup> |
|------------------------------------------------------|------------------------------------------|-------------------------------------------------|
| Age, years                                           |                                          |                                                 |
| 18-49                                                | 373/15,401 (2.4)                         | 0.48 (0.42-0.54)                                |
| 50-64 (ref)                                          | 768/15,729 (4.9)                         | -                                               |
| 65-74                                                | 1,009/12,221 (8.3)                       | 1.68 (1.53-1.86)                                |
| ≥75                                                  | 692/7,581 (9.1)                          | 1.80 (1.62-2.01)                                |
| Female sex                                           | 273/7,339 (3.7)                          | 0.63 (0.57-0.70)                                |
| Race                                                 |                                          |                                                 |
| White (ref)                                          | 2,308/37,204 (6.2)                       | -                                               |
| Black                                                | 453/11,860 (3.8)                         | 0.63 (0.57-0.70)                                |
| Other                                                | 81/1,868 (4.3)                           | 0.83 (0.66-1.04)                                |
| Hispanic ethnicity                                   | 184/4,438 (4.1)                          | 0.78 (0.67-0.91)                                |
| Rural residence <sup>a</sup>                         | 575/7,529 (7.6)                          | 1.31 (1.19-1.44)                                |
| Region                                               |                                          |                                                 |
| West (ref)                                           | 606/12,216 (5.0)                         | -                                               |
| Midwest                                              | 632/9,829 (6.4)                          | 1.29 (1.15-1.45)                                |
| Northeast                                            | 499/6,175 (8.1)                          | 1.64 (1.45-1.86)                                |
| South                                                | 1,105/22,712 (4.9)                       | 1.04 (0.94-1.16)                                |
| COVID-19 vaccination <sup>b</sup>                    |                                          |                                                 |
| None (ref)                                           | 796/15,918 (5.0)                         | -                                               |
| Partial                                              | 168/2,278 (7.4)                          | 1.38 (1.16-1.65)                                |
| Full                                                 | 1,079/20,998 (5.1)                       | 0.93 (0.85-1.03)                                |
| Boosted                                              | 799/11,726 (6.8)                         | 1.01 (0.91-1.12)                                |
| Smoking <sup>a</sup>                                 |                                          |                                                 |
| Never (ref)                                          | 1,058/20,025 (5.3)                       | -                                               |
| Former                                               | 1,250/20,087 (6.2)                       | 1.01 (0.92-1.10)                                |
| Current                                              | 432/8,914 (4.8)                          | 0.95 (0.84-1.07)                                |
| Alcohol dependence <sup>a</sup>                      | 462/1,1437 (4.0)                         | 0.77 (0.69-0.85)                                |
| Substance dependence <sup>c</sup>                    | 120/2,971 (4.0)                          | 0.86 (0.71-1.04)                                |
| Number of underlying conditions <sup>a</sup>         |                                          |                                                 |
| 1-2 (ref)                                            | 560/18,157 (3.1)                         | -                                               |
| 3-4                                                  | 870/15,696 (5.5)                         | 1.54 (1.38-1.72)                                |
| ≥5                                                   | 1,391/16,195 (8.6)                       | 1.94 (1.74-2.17)                                |
| Cancer                                               | 823/9,845 (8.4)                          | 1.32 (1.21-1.44)                                |
| Cardiovascular disease                               | 1,349/16,376 (8.2)                       | 1.39 (1.28-1.50)                                |
| Chronic kidney disease                               | 595/6,688 (8.9)                          | 1.35 (1.23-1.49)                                |
| Chronic lung disease                                 | 1,171/16,035 (7.3)                       | 1.25 (1.16-1.36)                                |
| Diabetes                                             | 1,217/15,697 (7.8)                       | 1.35 (1.25-1.46)                                |
| Immunosuppressive or cancer medications <sup>d</sup> | 392/3,029 (12.9)                         | 2.47 (2.20-2.78)                                |
| Mental health conditions <sup>e</sup>                | 1,115/22,342 (5.0)                       | 1.05 (0.97-1.14)                                |



|                                                      |                    |                  |
|------------------------------------------------------|--------------------|------------------|
| Obese (body mass index $\geq 30$ kg/m <sup>2</sup> ) | 1,466/26,363 (5.6) | 1.16 (1.08-1.26) |
|------------------------------------------------------|--------------------|------------------|

<sup>a</sup>Includes sotrovimab, nirmatrelvir, molnupiravir, and remdesivir. Symptomatic Veterans had any of 15 pre-specified COVID-19-related symptoms present on the day of positive SARS-CoV-2 test or within the preceding 30 days.

<sup>b</sup>A total of 3,079 Veterans who received any COVID-19 pharmacotherapy out of 56,206 Veterans testing positive for SARS-CoV-2 were included. Models were limited to Veterans with complete data for all included covariates.

<sup>c</sup>All models adjusted for age, sex, race, and ethnicity.

## eReferences

1. Centers for Disease Control and Prevention. COVID-19 Vaccines for Moderately of Severely Immunocompromised People. Accessed June 3, 2022. <https://www.cdc.gov/coronavirus/2019-ncov/vaccines/recommendations/immuno.html>
